# Supplementary material for: The influence of personality and perceived stress on the development of breast cancer: 20-year follow-up of 29,098 Japanese women
Source: PubMed Central journal article supplement (PMC5009304; doi:10.1038/srep32559), 2016-09-02
Supplement: srep32559-s1.pdf [file srep32559-s1.pdf]

Scientific Reports

## **The influence of personality and perceived stress on the development of breast cancer: 20-year follow-up of 29,098 Japanese women**

Takayuki Sawada<sup>1,2</sup>, Takeshi Nishiyama<sup>2,\*</sup>, Norimasa Kikuchi<sup>1,2</sup>, Chaochen Wang<sup>2</sup>, Yingsong Lin<sup>2</sup>, Mitsuru Mori<sup>3</sup>, Kozo Tanno<sup>4</sup>, Akiko Tamakoshi<sup>5</sup>, Shogo Kikuchi<sup>2,\*</sup>

1) Clinical Study Support, Inc, Nagoya, 460-0003, Japan

2) Department of Public Health, Aichi Medical University School of Medicine, Nagakute, 480-1195, Japan

3) Department of Public Health, Sapporo Medical University School of Medicine, Sapporo, 060-8556, Japan

4) Department of Hygien and Preventive Medicine, Iwate Medical University School of Medicine, Morioka, 028-3694, Japan

5) Department of Public Health, Hokkaido University Graduate School of Medicine, Sapporo, 060-8638, Japan

**Supplementary Table 1. Hazard ratios(HR) with 95% confidence intervals(CI) for breast cancer by response to psychological questions**

| Response to questions                            | No. of women | Observed person-years | No. of cases | Age-adjusted |           | Multivariate-adjusted <sup>a</sup> |           |
|--------------------------------------------------|--------------|-----------------------|--------------|--------------|-----------|------------------------------------|-----------|
|                                                  |              |                       |              | HR           | 95% CI    | HR                                 | 95% CI    |
| <b>Having "ikigai"</b>                           |              |                       |              |              |           |                                    |           |
| Do you have "ikigai"?                            |              |                       |              |              |           |                                    |           |
| Disagree/Neither                                 | 16,573       | 211,307               | 129          | 1.00         |           | 1.00                               |           |
| Agree/Agree strongly                             | 12,525       | 160,849               | 80           | 0.80         | 0.61-1.06 | 0.77                               | 0.58-1.02 |
| <b>Decisiveness</b>                              |              |                       |              |              |           |                                    |           |
| Do you make decisions quickly?                   |              |                       |              |              |           |                                    |           |
| Disagree/Neither                                 | 22,361       | 285,679               | 158          | 1.00         |           | 1.00                               |           |
| Agree                                            | 6,737        | 86,477                | 51           | 1.04         | 0.76-1.43 | 0.92                               | 0.67-1.28 |
| <b>Ease of anger arousal</b>                     |              |                       |              |              |           |                                    |           |
| Are you easily angered?                          |              |                       |              |              |           |                                    |           |
| Disagree/Neither                                 | 25,184       | 322,571               | 185          | 1.00         |           | 1.00                               |           |
| Agree                                            | 3,914        | 49,585                | 24           | 0.82         | 0.53-1.25 | 0.73                               | 0.48-1.12 |
| <b>Psychological stress</b>                      |              |                       |              |              |           |                                    |           |
| Do you experience stress during your daily life? |              |                       |              |              |           |                                    |           |
| Disagree/Neither                                 | 22,938       | 293,515               | 156          | 1.00         |           | 1.00                               |           |
| Agree/Agree strongly                             | 6,160        | 78,641                | 53           | 1.22         | 0.89-1.68 | 1.16                               | 0.84-1.59 |

<sup>a</sup>Adjusted for age, study area, educational level, family history of breast cancer, age at menarche, age at menopause, age at first birth, parity, use of exogenous female hormone, alcohol drinking, consumption of green leafy vegetables, daily walking, exercise, sedentary work, height, and body mass index
